# Supplementary material for: Differential modulation of behavior by infraslow activities of different brain regions
Source: PeerJ journal article supplement (doi:10.7717/peerj.12875), 2022-02-01
Supplement: EEG_Continuous_gameplay_of_an_8-bit_style_video_game_-_Snapshot_1.1.0_-_OpenNeuro.pdf [file EEG_Continuous_gameplay_of_an_8-bit_style_video_game_-_Snapshot_1.1.0_-_OpenNeuro.pdf]

## Versions

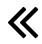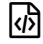

1.0.0

2021-02-16

[\(/datasets/ds003517\)](#)

1.1.0

2021-02-16

[\(/datasets/ds003517\)](#)

# EEG: Continuous gameplay of an 8-bit style video game

uploaded by James F Cavanagh on 2021-02-15 - 3 months ago

last modified on 2021-02-15 - 3 months ago

authored by James F Cavanagh, Joel Castellanos

📄 14 👁 2380

✔ Valid

1 Warning

**OpenNeuro Accession Number:** ds003517**Files:** 389, **Size:** 5.83GB, **Subjects:** 17, **Session:** 1**Tasks:** ContinuousVideoGamePlay**Modalities:** channels, coordsystem, eeg, electrodes, events

## README

## AUTHORS

## DATASET DOI

10.18112/openneuro.ds003517.v1.1.0

## LICENSE

---

## ACKNOWLEDGEMENTS

---

## HOW TO ACKNOWLEDGE

---

## FUNDING

---

## REFERENCES AND LINKS

---

## ETHICS APPROVALS

---

## HOW TO CITE

[Text](#)   [BibTeX](#)   [🔗 Copy](#)

James F Cavanagh and Joel Castellanos (2021). EEG: Continuous gameplay of an 8-bit style video game. OpenNeuro. [Dataset] doi: 10.18112/openneuro.ds003517.v1.1.0

[More citation info \(/cite\)](#)

---

## COMMENTS

Please sign in to contribute to the discussion.
